# Supplementary material for: Membrane-Disruptive Effects of Fatty Acid and Monoglyceride Mitigants on E. coli Bacteria-Derived Tethered Lipid Bilayers
Source: MDPI journal article supplement (doi:10.3390/molecules29010237), 2024-01-01
Supplement: s1 [file s1]

## Supplementary Materials

### Membrane-Disruptive Effects of Fatty Acid and Monoglyceride Mitigants on *E. coli* Bacteria-Derived Tethered Lipid Bilayers

Sue Woon Tan <sup>1</sup>, Bo Kyeong Yoon <sup>2,\*</sup> and Joshua A. Jackman <sup>1,\*</sup>

<sup>1</sup> School of Chemical Engineering and Translational Nanobioscience Research Center, Sungkyunkwan University, Suwon 16419, Republic of Korea

<sup>2</sup> School of Healthcare and Biomedical Engineering, Chonnam National University, Yeosu 59626, Republic of Korea

\* Correspondence: bkyoon@jnu.ac.kr and jjackman@skku.edu

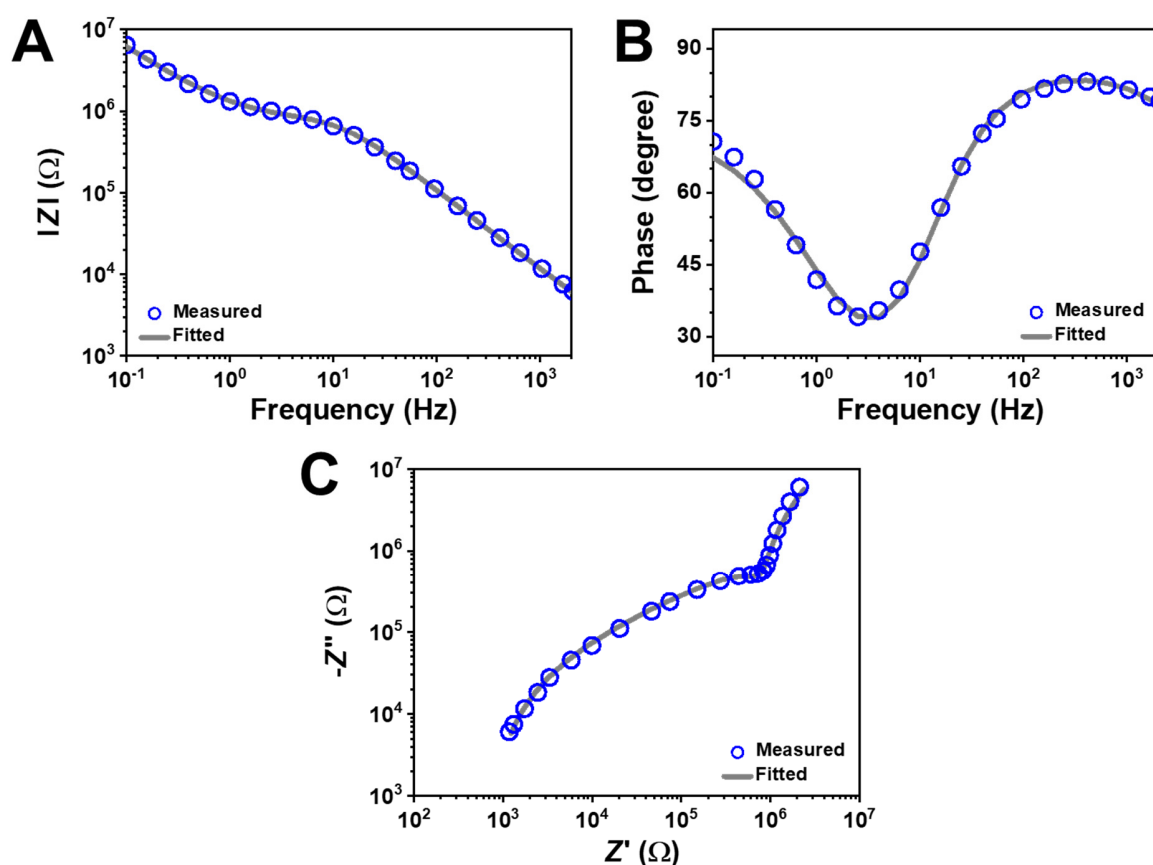

**Figure S1. Representative Bode and Nyquist plot representations for *E. coli* tBLM platform formed using total lipid extract.** Bode plot representations for (A) magnitude of total impedance (defined as  $|Z|$ ) vs. frequency and (B) phase vs. frequency. Nyquist plot representation for (C) imaginary part of impedance (defined as  $Z''$ ; plotted as  $-Z''$ ) vs. real part of impedance (defined as  $Z'$ ). Blue circles are experimental data points from EIS frequency sweep measurements and gray lines are drawn from calculated best-fit values that were obtained from fitting the data to an equivalent circuit model.

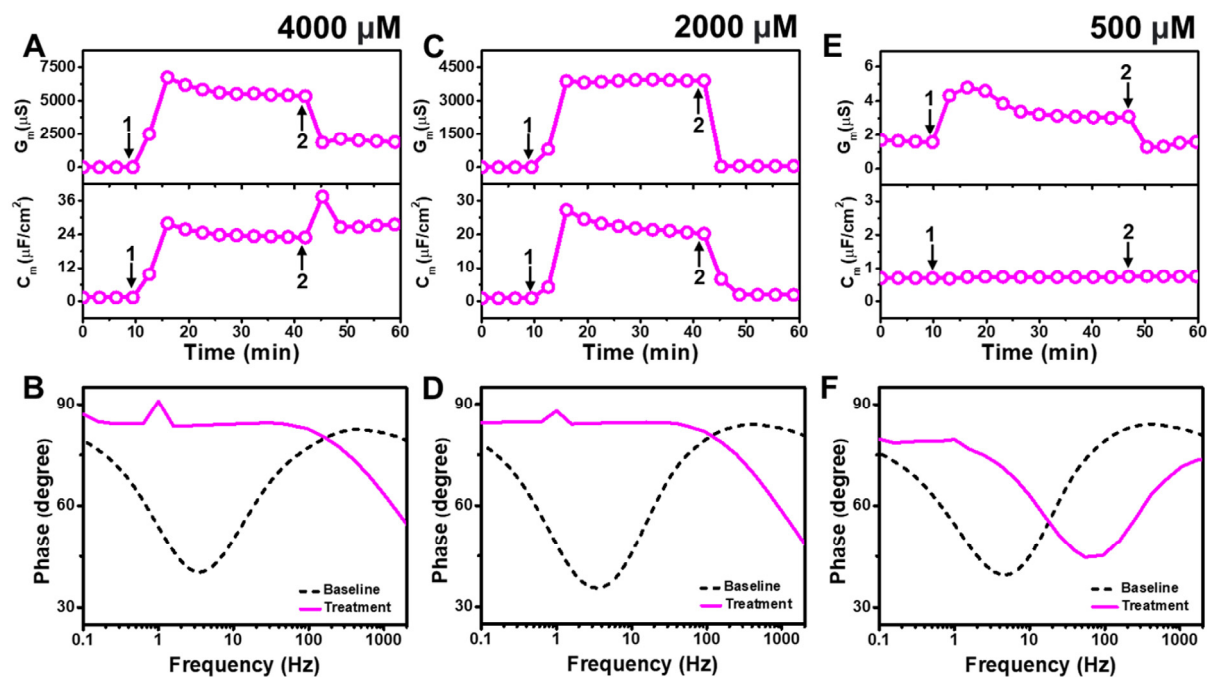

**Figure S2. Time-resolved EIS measurements tracking effects of sodium dodecyl sulfate (SDS) treatment on total *E. coli* lipid-derived tBLM platform.** (A) Conductance ( $G_m$ ) and capacitance ( $C_m$ ) signals are reported as a function of time for the addition of 4000  $\mu\text{M}$  SDS ( $4\times$  CMC) to tBLM platform at  $t=10$  min (arrow 1) and subsequent buffer rinsing step at  $t=40$  min (arrow 2). The baseline signals depict the tBLM platform prior to SDS addition. (B) Bode plot snapshots for tBLM platform prior to SDS addition and during SDS treatment. (C-F) Corresponding data for 2000  $\mu\text{M}$  SDS ( $2\times$  CMC) and 500  $\mu\text{M}$  SDS ( $0.5\times$  CMC) treatment cases. Graphs are representative from three independent runs.

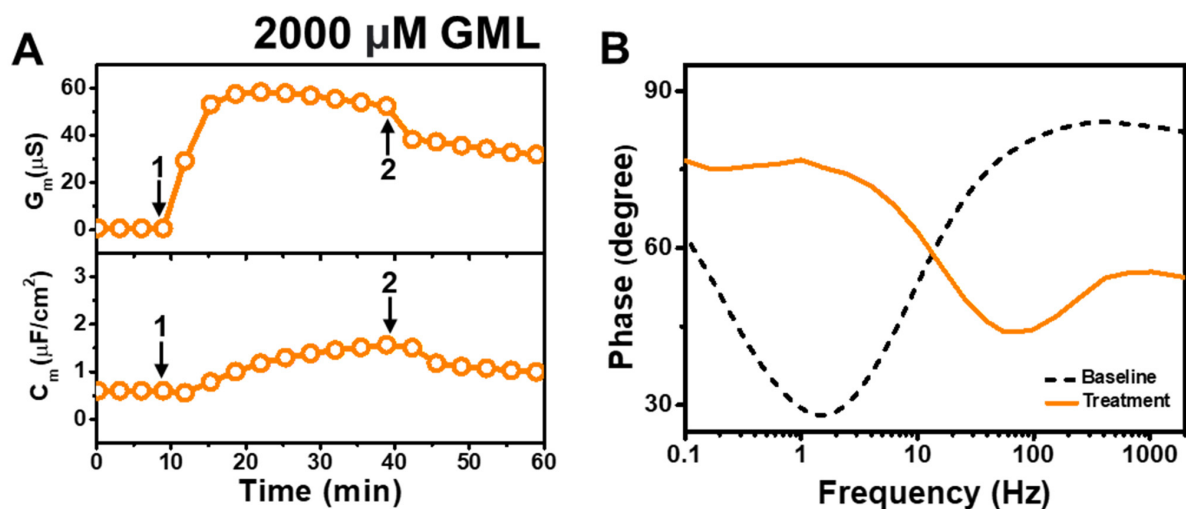

**Figure S3. Time-resolved EIS measurements tracking effects of 2000  $\mu\text{M}$  glycerol monolaurate (GML) treatment on total *E. coli* lipid-derived tBLM platform. (A)** Conductance ( $G_m$ ) and capacitance ( $C_m$ ) signals are reported as a function of time for the addition of 2000  $\mu\text{M}$  GML to tBLM platform at  $t=10$  min (arrow 1) and subsequent buffer rinsing step at  $t=40$  min (arrow 2). The baseline signals depict the tBLM platform prior to GML addition. **(B)** Bode plot snapshots for tBLM platform prior to GML addition and during GML treatment.

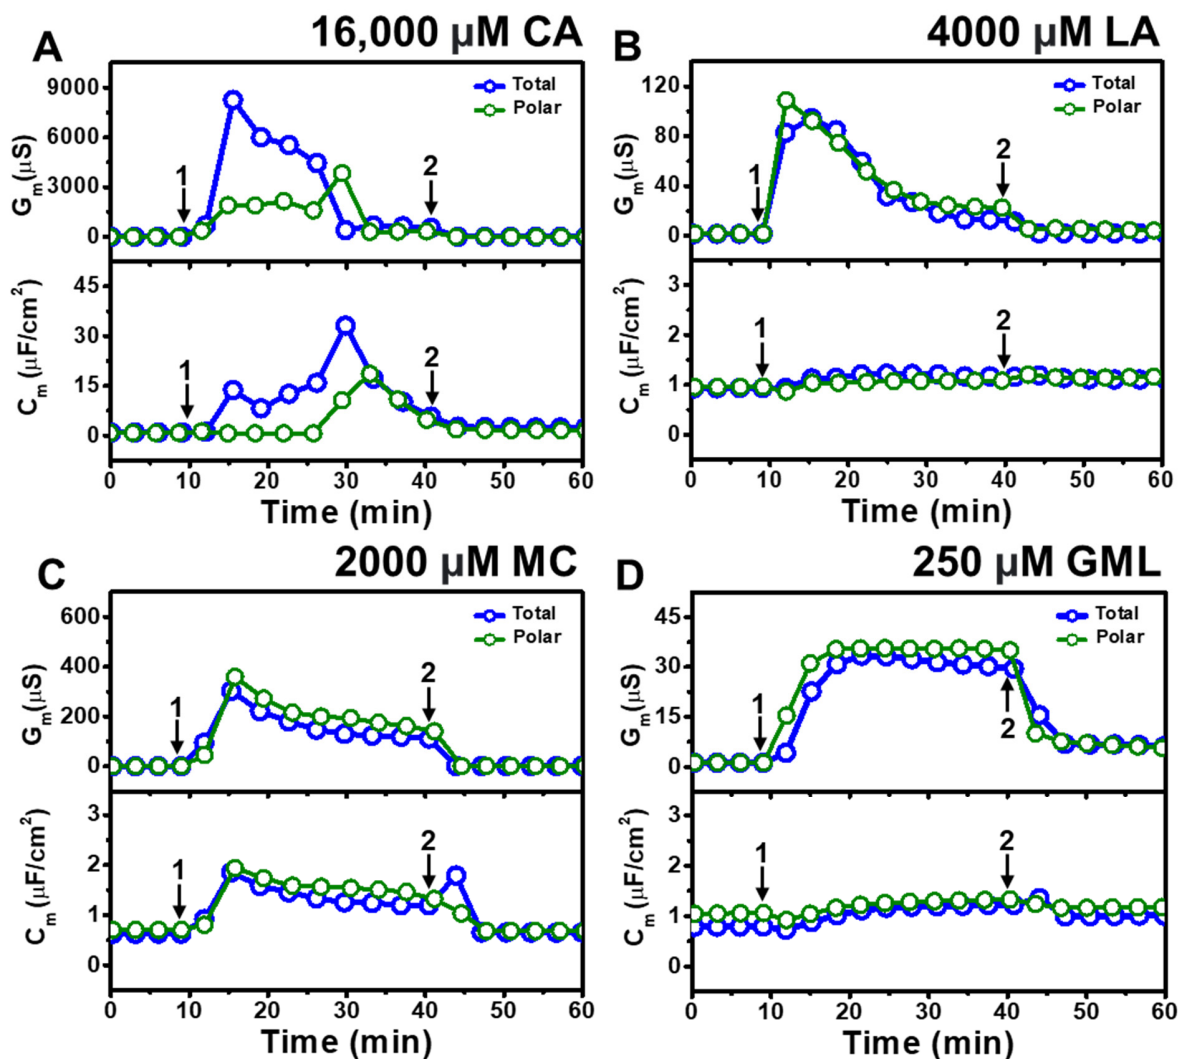

**Figure S4. Comparison of EIS measurement responses using total and polar *E. coli* lipid-derived tBLM platforms.** (A) Conductance ( $G_m$ ) and capacitance ( $C_m$ ) signals are reported as a function of time for the addition of 16,000  $\mu\text{M}$  CA to tBLM platform at  $t=10$  min (arrow 1) and subsequent buffer rinsing step at  $t=40$  min (arrow 2). Blue and green circles signify the total and polar *E. coli* lipid extract cases, respectively. The baseline signals depict the tBLM platform prior to GML addition. (B-D) Corresponding data for 4000  $\mu\text{M}$  LA, 2000  $\mu\text{M}$  MC, and 250  $\mu\text{M}$  GML treatment cases. Graphs are representative from three independent runs.

**Table S1. Summary of EIS measurement responses.** The maximum EIS responses upon compound addition at specified concentration to *E. coli* tBLM platform formed using total lipid extract are reported relative to baseline values. For comparison, the corresponding  $\Delta G_m$  and  $\Delta C_m$  shift values for 2000  $\mu\text{M}$  GML ( $\sim 32\times$  CMC) were  $62 \pm 6 \mu\text{S}$  and  $0.7 \pm 0.1 \mu\text{F}/\text{cm}^2$ , respectively. In addition, at  $0.5\times$  CMC, the  $\Delta G_m$  and  $\Delta C_m$  shift values for all tested compounds were less than  $\sim 2 \mu\text{S}$  and  $\sim 0 \mu\text{F}/\text{cm}^2$ , respectively.

| Compound | 4 $\times$ CMC                    |                                               | 2 $\times$ CMC                    |                                               |
|----------|-----------------------------------|-----------------------------------------------|-----------------------------------|-----------------------------------------------|
|          | $\Delta G_m$<br>( $\mu\text{S}$ ) | $\Delta C_m$<br>( $\mu\text{F}/\text{cm}^2$ ) | $\Delta G_m$<br>( $\mu\text{S}$ ) | $\Delta C_m$<br>( $\mu\text{F}/\text{cm}^2$ ) |
| SDS      | $7408 \pm 621$                    | $32 \pm 4$                                    | $4196 \pm 295$                    | $27 \pm 2$                                    |
| CA       | $7143 \pm 3064$                   | $31 \pm 11$                                   | $133 \pm 60$                      | $0.6 \pm 0.2$                                 |
| LA       | $91 \pm 3$                        | $0.3 \pm 0.1$                                 | $45 \pm 1$                        | $0.2 \pm 0.1$                                 |
| MC       | $422 \pm 173$                     | $1.6 \pm 0.5$                                 | $67 \pm 8$                        | $0.2 \pm 0.1$                                 |
| GML      | $28 \pm 4$                        | $0.1 \pm 0.1$                                 | $11 \pm 1$                        | $0.1 \pm 0.03$                                |
